# Supplementary material for: Anomalous in-plane lattice thermal conductivity in an atomically thin two-dimensional α-GeTe layer
Source: Royal Society of Chemistry journal article supplement (doi:10.1039/d0cp00738b), 2020-01-01
Supplement: d0cp00738b1.pdf [file d0cp00738b1.pdf]

# Anomalous in-plane lattice thermal conductivity in atomically thin two dimensional $\alpha$ -GeTe layer

Brahim Marfoua <sup>a</sup>, Young Soo Lim <sup>b</sup>, and Jisang Hong <sup>a,\*</sup>

<sup>a</sup> Department of Physics, Pukyong National University, Busan 48513, Korea

<sup>b</sup> Department of Materials System Engineering, Pukyong National University, Busan 48513,  
Korea

## Corresponding Authors

\* hongj@pknu.ac.kr

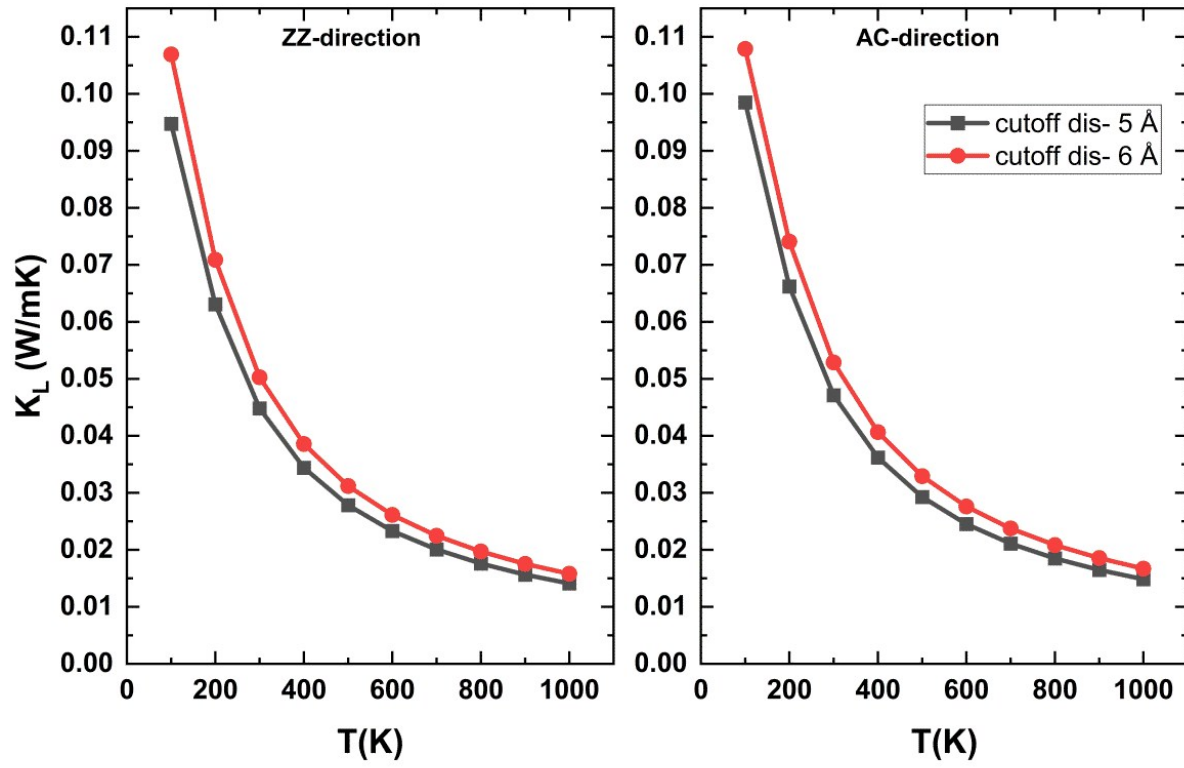

**Fig. S1** Convergence test of the thermal conductivity with respect to the cut-off distance of  $\alpha$ -GeTe bilayer along (a) ZZ direction and (b) AC direction.

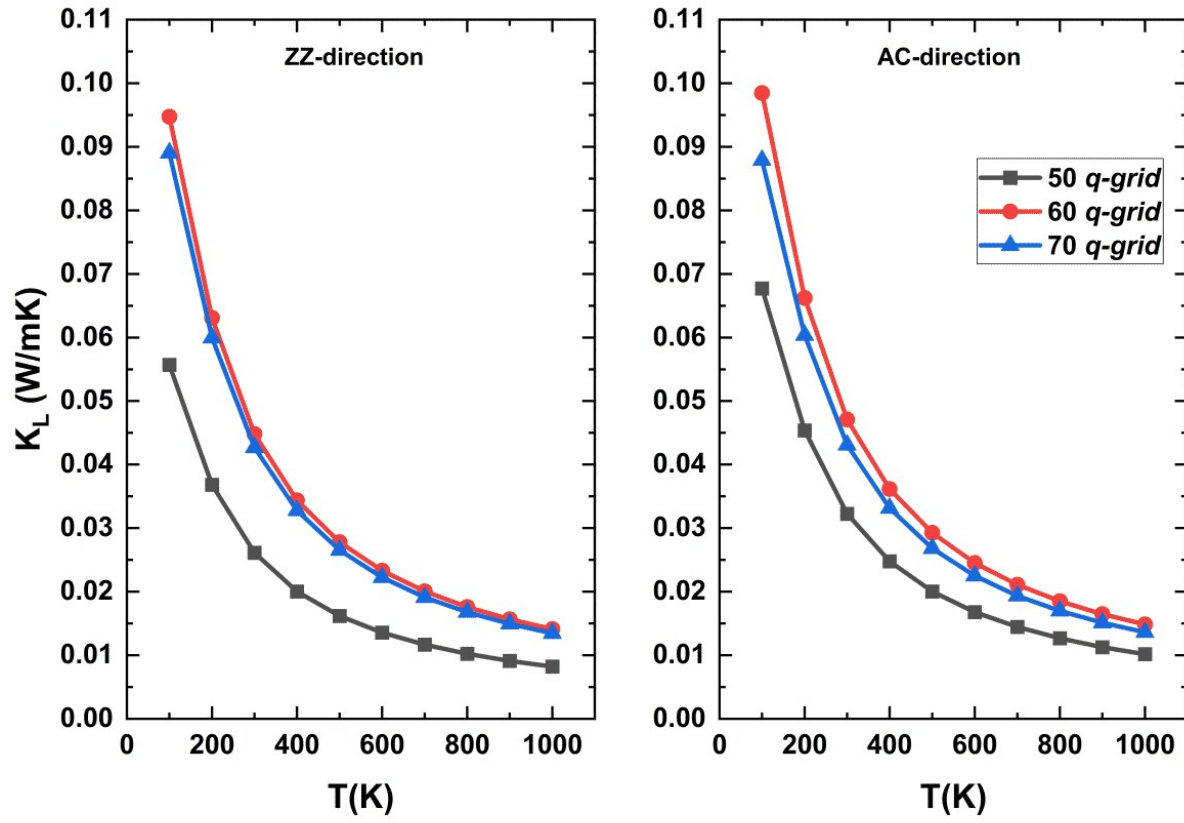

**Fig. S2** Convergence test of the thermal conductivity with respect to the q-point of  $\alpha$ -GeTe bilayer along (a) ZZ direction and (b) AC direction.
